# Supplementary material for: Differential Hemodynamic Response of Pial Arterioles Contributes to a Quadriphasic Cerebral Autoregulation Physiology
Source: PubMed Central journal article supplement — J Am Heart Assoc. 2021 Dec 21;11(1):e022943. doi: 10.1161/JAHA.121.022943 (PMC9075199; doi:10.1161/jaha.121.022943), 2021-12-21
Supplement: JAH3-11-e022943-s001.pdf [file JAH3-11-e022943-s001.pdf]

# **SUPPLEMENTAL MATERIAL**

**Figure S1. Experimental timeline per arteriole demonstrating the changes over time (hours:minutes) of cerebral perfusion pressure (CPP, mmHg), arteriolar diameter ( $\mu\text{m}$ ), red blood cell (RBC) velocity ( $\mu\text{m}/\text{s}$ ), and RBC flux (nl/s) using a generalized additive model (GAM) smoothing function per arteriole (n=52).**

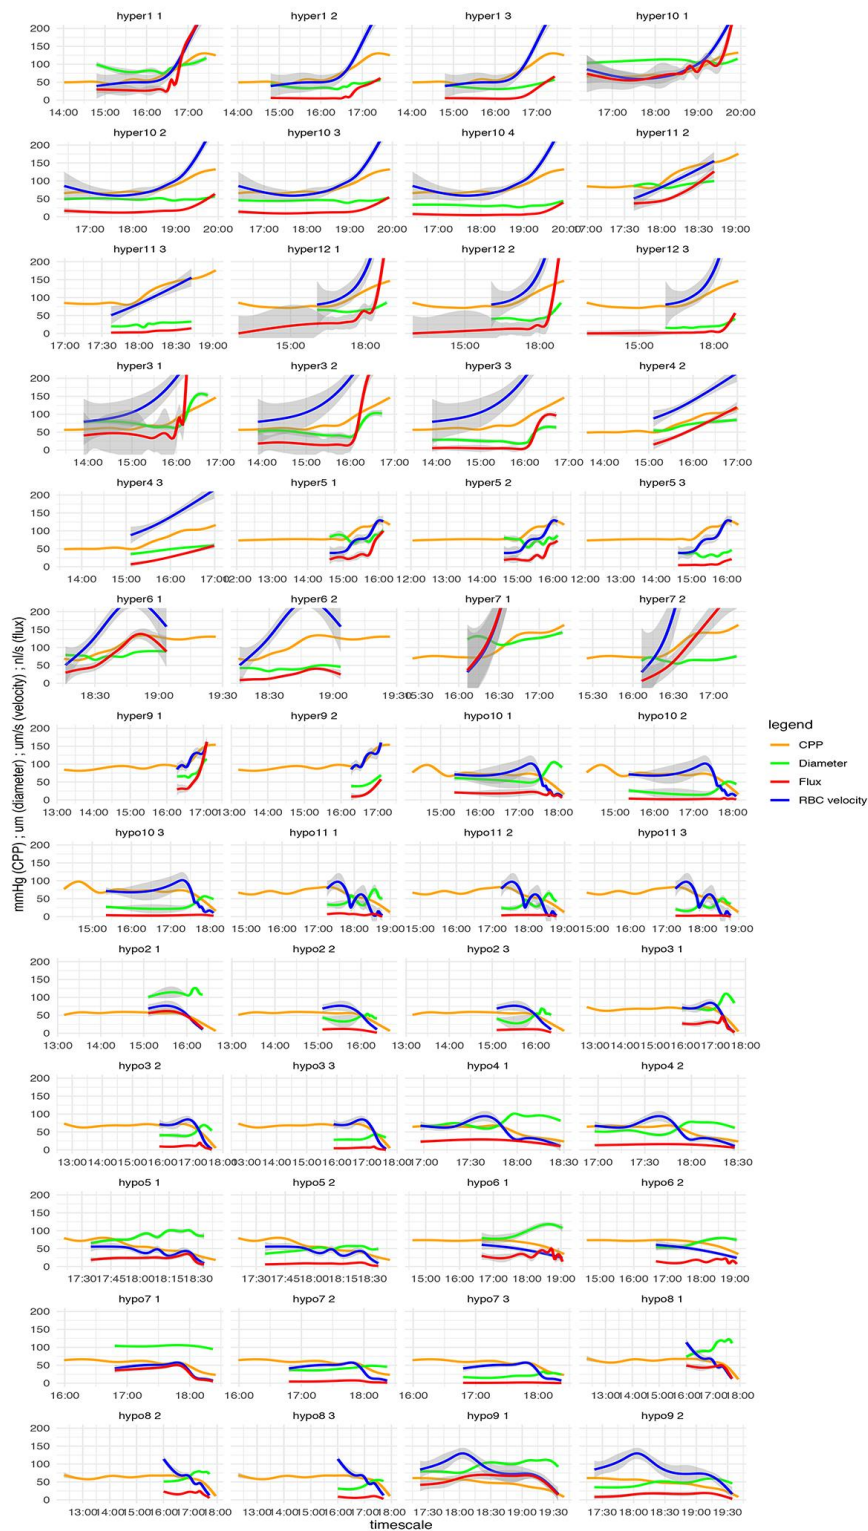

Grey shading: standard error.

**Figure S2. Relationship between intracranial pressure (ICP, mmHg) and cerebral perfusion pressure (CPP, mmHg) per experiment (n=20).**

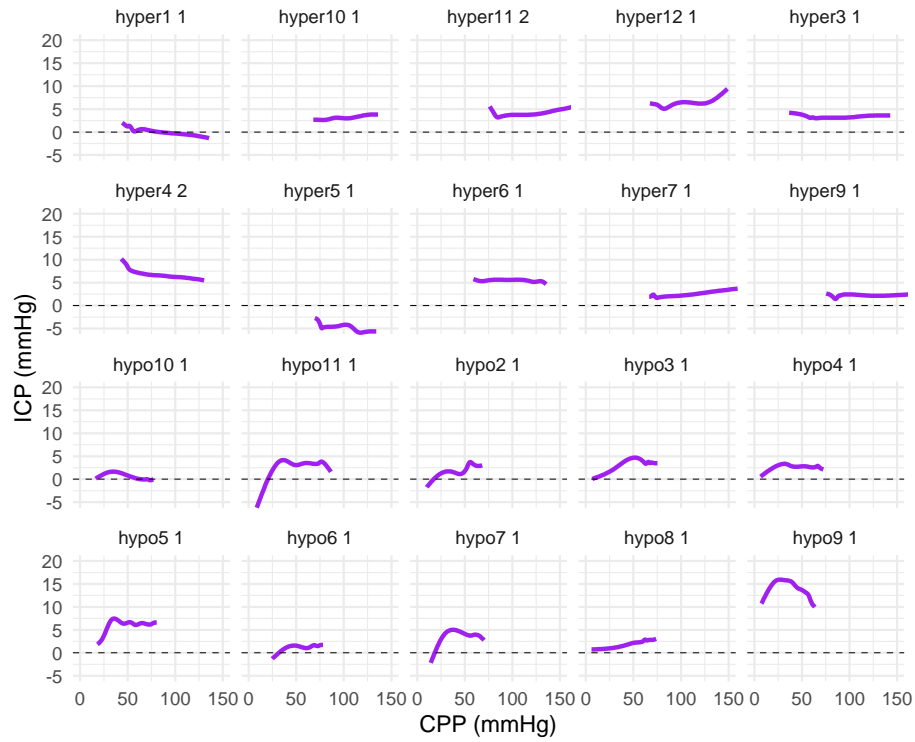

**Figure S3. Relative differences compared to baseline in pial arteriolar red blood cell (RBC) velocity and flux adjustment to changes in cerebral perfusion pressure (CPP) according to size category.**

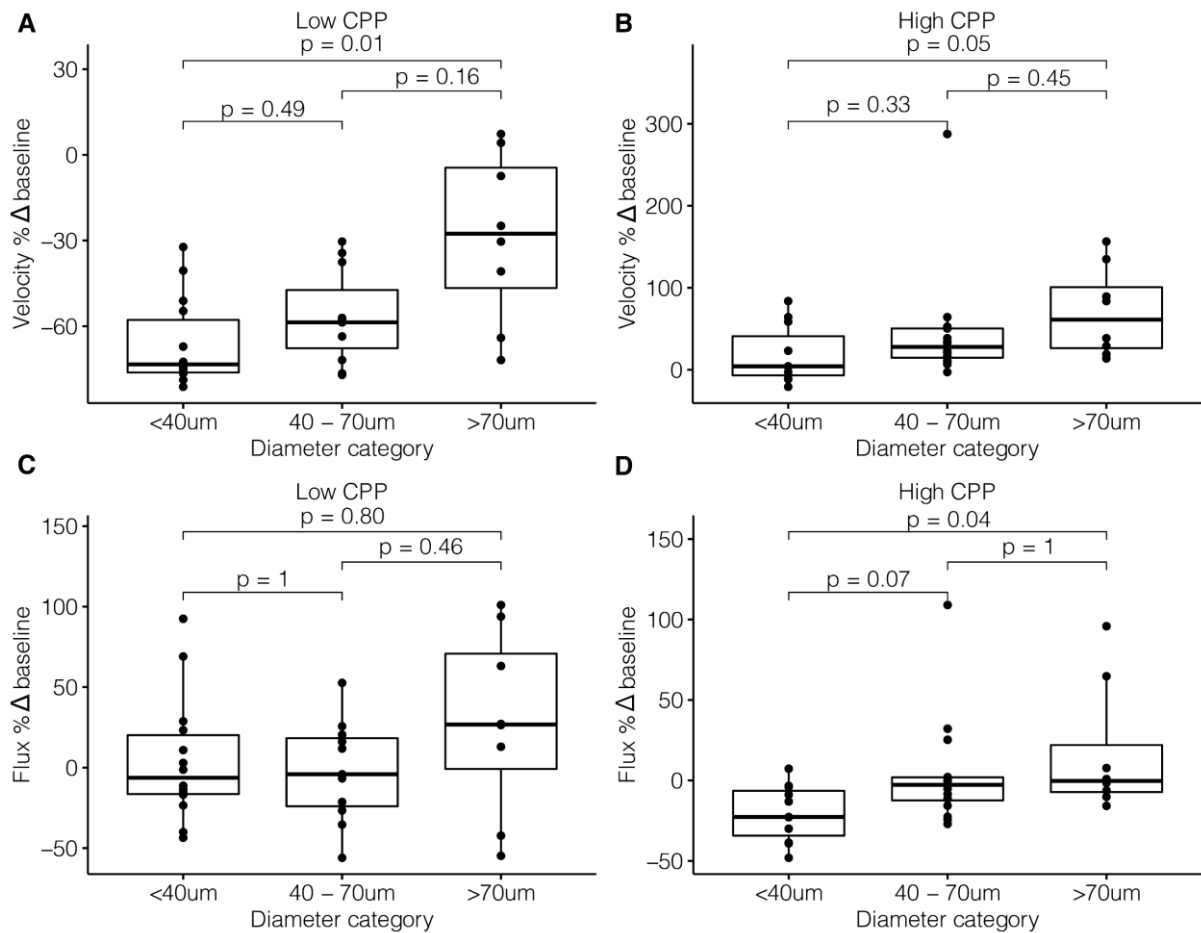

**(A)** RBC velocity changes relative to baseline (delta %) at the point of maximal vasodilation per arteriole during hypotension. **(B)** RBC velocity changes relative to baseline (delta %) at the point of maximal vasoconstriction per arteriole during hypertension. **(C)** RBC flux changes relative to baseline (delta %) at the point of maximal vasodilation per arteriole during hypotension. **(D)** RBC flux changes relative to baseline (delta %) at the point of maximal vasoconstriction per arteriole during hypertension. Bonferroni adjusted significance levels for the Wilcoxon signed-rank test are shown above the boxplots.
